# Supplementary material for: Weight Categories, Trajectories, Eating Behavior, and Metabolic Consequences during Pregnancy and Postpartum in Women with GDM
Source: MDPI journal article supplement (doi:10.3390/nu16040560), 2024-02-18
Supplement: s1 [file s1]

## Supplementary Materials

**Supplementary Table S1.** PPWR at 1 year postpartum according to EGWG.

|                | EGWG<br>(mean ± SD) | No-EGWG<br>(mean ± SD) | Differences | P-values |
|----------------|---------------------|------------------------|-------------|----------|
| <b>Overall</b> | 6.02±7.40           | 2.24±5.50              | -3.80       | <0.0001  |
| <b>WNW</b>     | 6.43±5.57           | 2.26±4.42              | -4.17       | <0.0001  |
| <b>WOW</b>     | 6.21±7.20           | 1.40±6.02              | -4.81       | <0.0001  |
| <b>WOB</b>     | 4.94±10.02          | 3.11±7.34              | -1.83       | 0.3087   |

Data are shown as mean ± standard deviations.

WNW denotes women with normal pre-pregnancy BMI, WOW denotes women with overweight pre-pregnancy BMI, WOB denotes women with obese pre-pregnancy BMI and EGWG denotes excessive gestational weight gain.

P-values are derived from t-tests.

**Supplementary Table S2.** Weight trajectories in WNW according to BMI tertiles.

| Variables                                                                 | WNW (n=230) |            |            | Overall<br>P-value | P-value<br>T2 vs T1 | P-value<br>T3 vs T1 | P-value<br>T2 vs T3 |
|---------------------------------------------------------------------------|-------------|------------|------------|--------------------|---------------------|---------------------|---------------------|
|                                                                           | T1          | T2         | T3         |                    |                     |                     |                     |
| <b>GWG</b>                                                                | 13.94±5.88  | 13.57±4.67 | 13.20±6.21 | 0.7370             | 1.000               | 1.000               | 1.000               |
| <b>Weight changes<br/>between 6-8 weeks<br/>and 1 year<br/>postpartum</b> | -3.55±3.85  | -1.62±4.56 | -1.67±5.91 | 0.0184             | 0.042               | 0.047               | 1.000               |
| <b>PPWR at 1 year<br/>postpartum</b>                                      | 2.30±4.09   | 4.47±5.13  | 3.08±5.62  | 0.0249             | 0.022               | 0.982               | 0.262               |

Data are shown as mean ± standard deviations.

Data are shown for BMI tertiles with the WNW group, T1 being the lowest and T3 the highest tertile.

WNW denotes women with normal weight pre-pregnancy, GWG denotes gestational weight gain and PPWR denotes postpartum weight retention.

P-values are derived from ANOVA.

**Supplementary Table S3:** Prevalence of glucose intolerance at 1 year postpartum.

| Variables          | Total (n=464) | WNW (n=230) | WOW (n=138) | WOB (n=96) | P-values |
|--------------------|---------------|-------------|-------------|------------|----------|
| Normal             | 282 (60.78)   | 160 (69.57) | 75 (54.35)  | 47 (48.96) |          |
| Prediabetes (n, %) | 169 (36.42)   | 65 (28.26)  | 59 (42.75)  | 45 (46.88) | 0.004    |
| Diabetes (n, %)    | 13 (2.80)     | 5 (2.17)    | 4 (2.90)    | 4 (4.17)   |          |

Data are shown as numbers and percentages.

WNW denotes women with normal pre-pregnancy BMI, WOW denotes women with overweight pre-pregnancy BMI, WOB denotes women with obese pre-pregnancy BMI.

P-values are derived from Chi-squared tests for differences in glucose tolerance (normal, prediabetes, diabetes).
